# Supplementary material
Source: publisher figshare collection journal article supplement (https://acs.figshare.com/ndownloader/files/12319853)
Supplement: Supplementary file 1 [file 12319853]

# **Bone Targeted Delivery of SDF-1 via Alendronate Functionalized Nanoparticles in Guiding Stem Cell Migration**

Qingchang Chen<sup>†, #</sup>, Chuping Zheng<sup>†, §, #</sup>, Yanqun Li<sup>†, #</sup>, Shaoquan Bian<sup>†</sup>, Haobo Pan<sup>†</sup>,  
Xiaoli Zhao<sup>\*†</sup>, William W. Lu<sup>‡</sup>.

<sup>†</sup>Research Center for Human Tissues and Organs Degeneration, Institute of Biomedicine and  
Biotechnology, Shenzhen Institutes of Advanced Technology, Chinese Academy of Sciences,  
Shenzhen, 518055, PR China

<sup>‡</sup>Department of Orthopaedic and Traumatology, The University of Hong Kong, 21 Sassoon  
Rd., Pokfulam, 999077, Hong Kong, PR China

<sup>§</sup>School of Pharmaceutical Science, Guangzhou Medical University, Guangzhou, Guangdong,  
511436, PR China.

\* Corresponding Email: zhaoxltju@gmail.com

## 1. Characterization of multi-differentiation potential of GFP<sup>+</sup> stem cells.

### *Methods:*

For osteogenic differentiation, cells were cultured in  $\alpha$ -MEM supplemented with 10% FBS,  $10^{-7}$  M dexamethasone (Sigma-Aldrich), 10 mM  $\beta$ -glycerol phosphate (Sigma-Aldrich), and 50 mM ascorbate-2-phosphate (Sigma-Aldrich). After 3 weeks of induction, cells were stained by Alizarin Red S staining for the mineralization. For adipogenic differentiation, cells were cultured in  $\alpha$ -MEM supplemented with 10% FBS,  $10^{-6}$  M dexamethasone, 0.5  $\mu$ M isobutylmethylxanthine (IBMX, Sigma-Aldrich), and 10 ng/mL of insulin (Sigma-Aldrich) for 2 weeks. Lipid accumulation was identified by Oil Red O staining. For chondrogenic differentiation, cells were cultured in high-density in F12:DMEM (1:1) supplemented with 1% FBS,  $10^{-7}$  M dexamethasone, 1% insulin-transferrin-selenium (ITS, Sigma-Aldrich), 50  $\mu$ M ascorbate-2-phosphate, 1 mM sodium pyruvate (Sigma-Aldrich), 50  $\mu$ g/mL of proline (Sigma-Aldrich), and 20 ng/mL of TGF- $\beta$ 3 (R&D Systems, Minneapolis, MN, USA). After 3 weeks in culture, cells were processed for alcian blue staining (Sigma-Aldrich).

### *Results:*

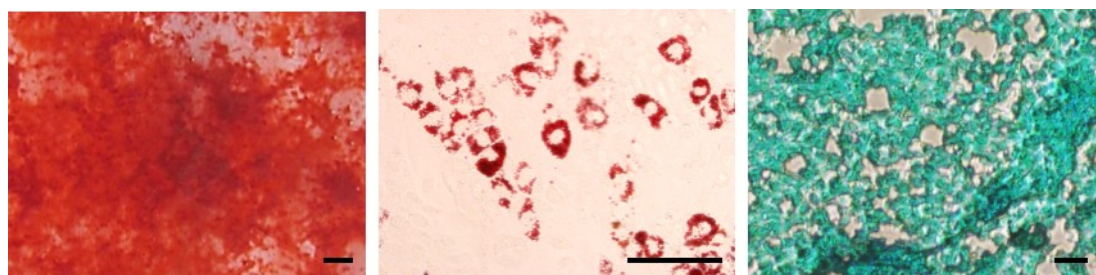

Figure S1. The multi-differentiation potential of GFP<sup>+</sup> stem cells was determined by osteogenic, adipogenic, and chondrogenic differentiation induced by different culture media. Scale bar, 100  $\mu$ m.
